# Supplementary material for: Effects of ε-Poly-L-Lysine Combined with Wuyiencin as a Bio-Fungicide against Botryris cinerea
Source: MDPI journal article supplement (doi:10.3390/microorganisms10050971), 2022-05-05
Supplement: s1 [file s1]

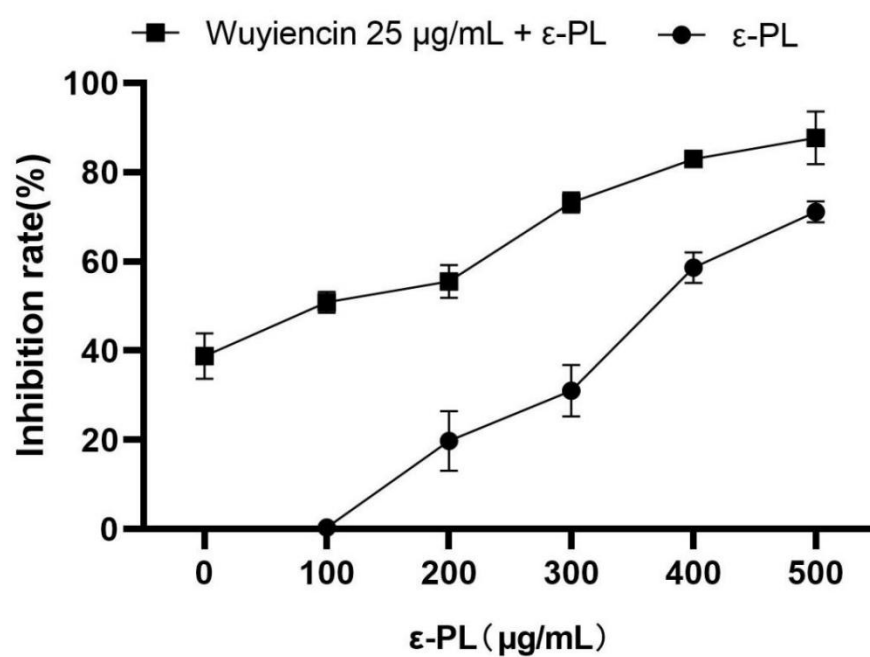

Figure S1. Inhibitory effect of various concentrations of  $\epsilon\text{-PL}$  and wuyiencin on the mycelial growth of *Botrytis cinerea*.

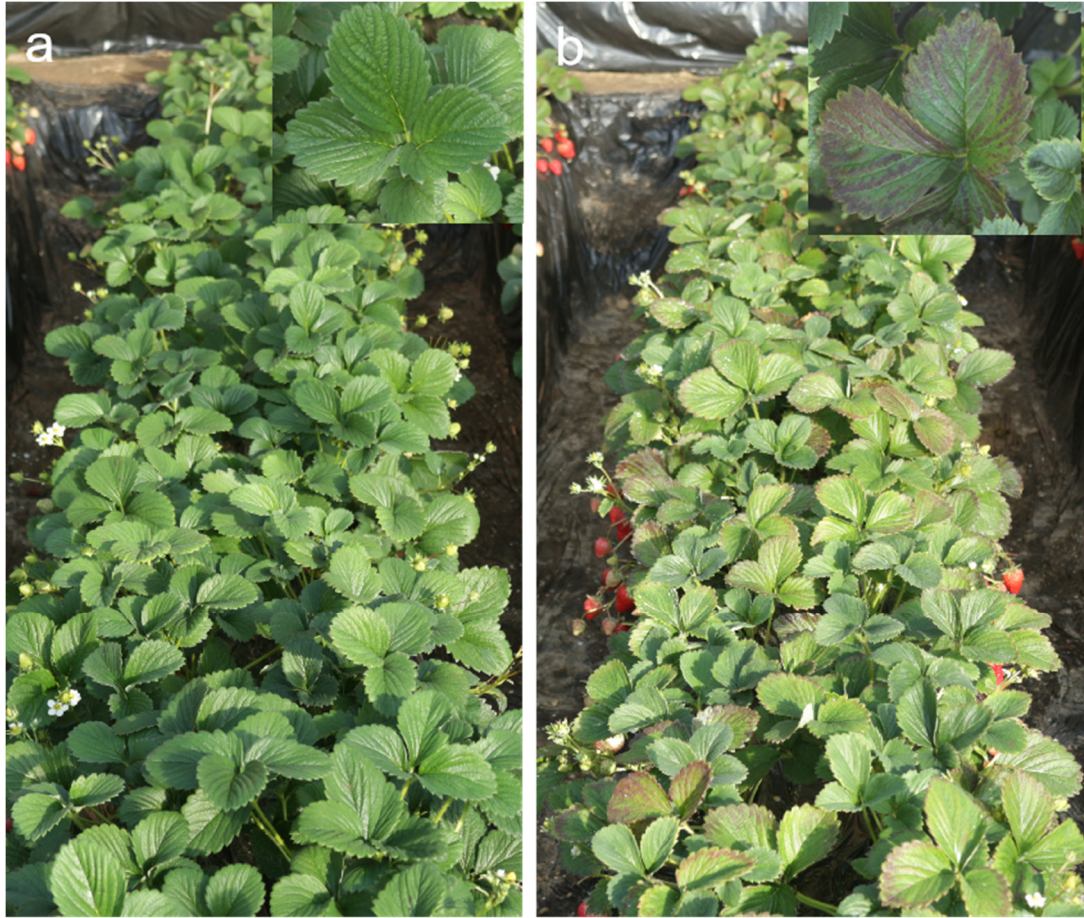

Figure S2. Effects of  $\epsilon$ -PL and wuyiencin on strawberry leaves.

(a): Treatment with 2000  $\mu\text{g/mL}$   $\epsilon$ -PL+ 60  $\mu\text{g/mL}$  wuyiencin; (b): Treatment with 2000  $\mu\text{g/mL}$   $\epsilon$ -PL.
